# Supplementary material
Source: PubMed Central journal article supplement (PMC4100558)

## Supplemental Figure 1

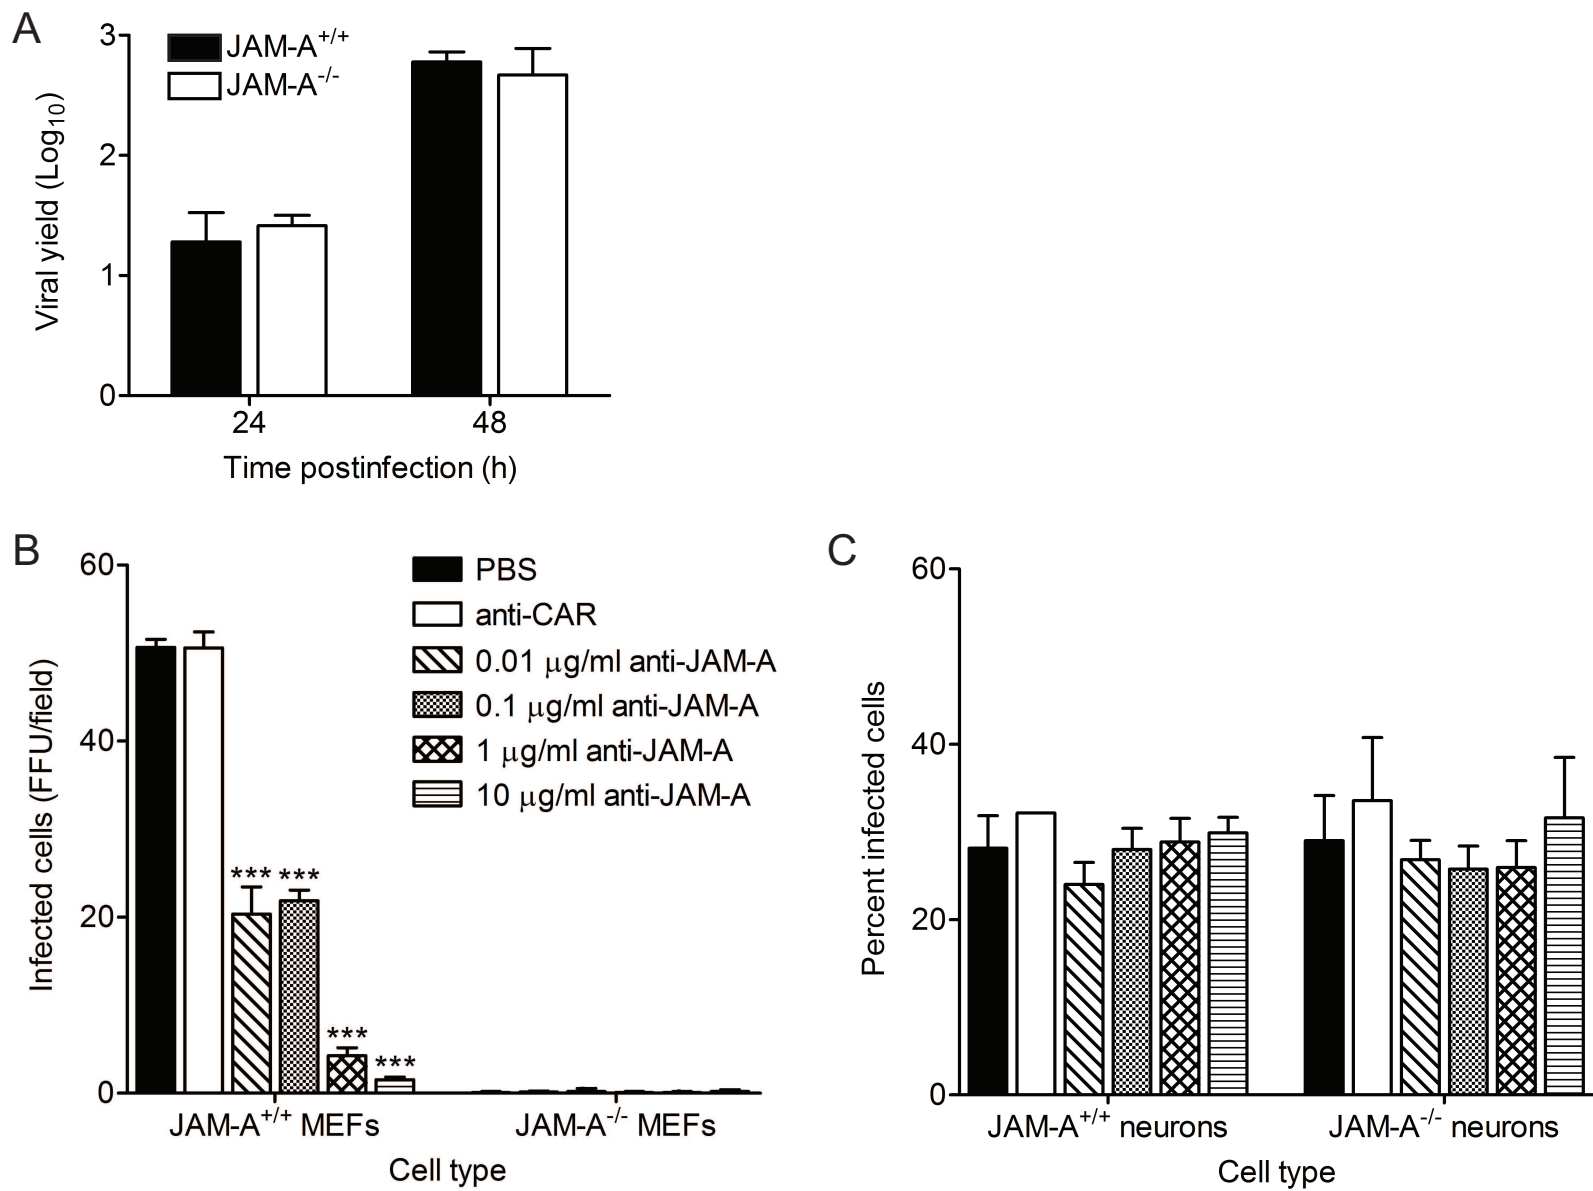

# Supplemental Figure 2

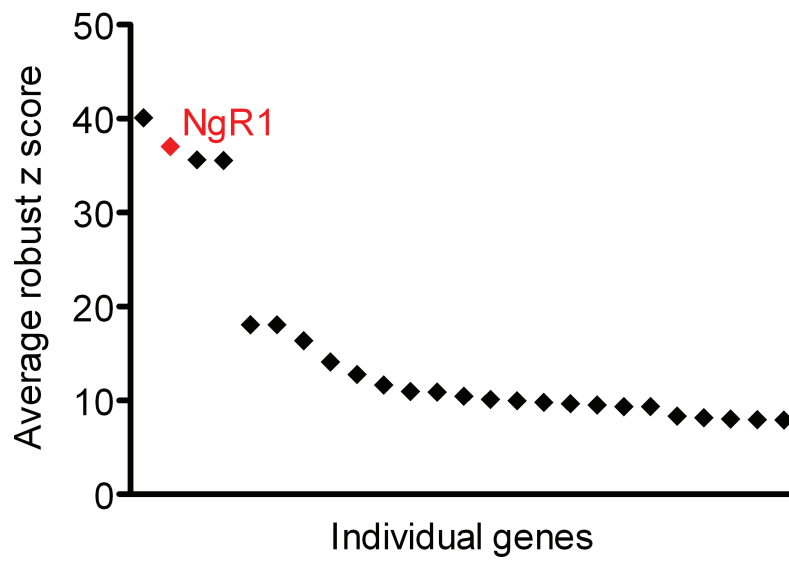

## Supplemental Figure 3

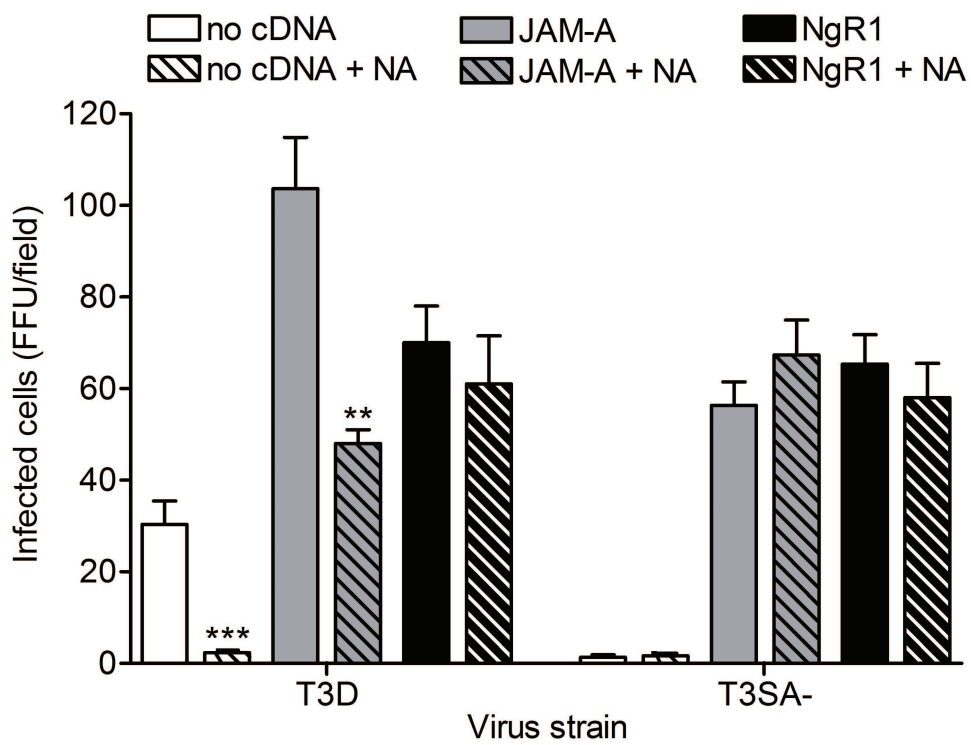

## Supplemental Figure 4

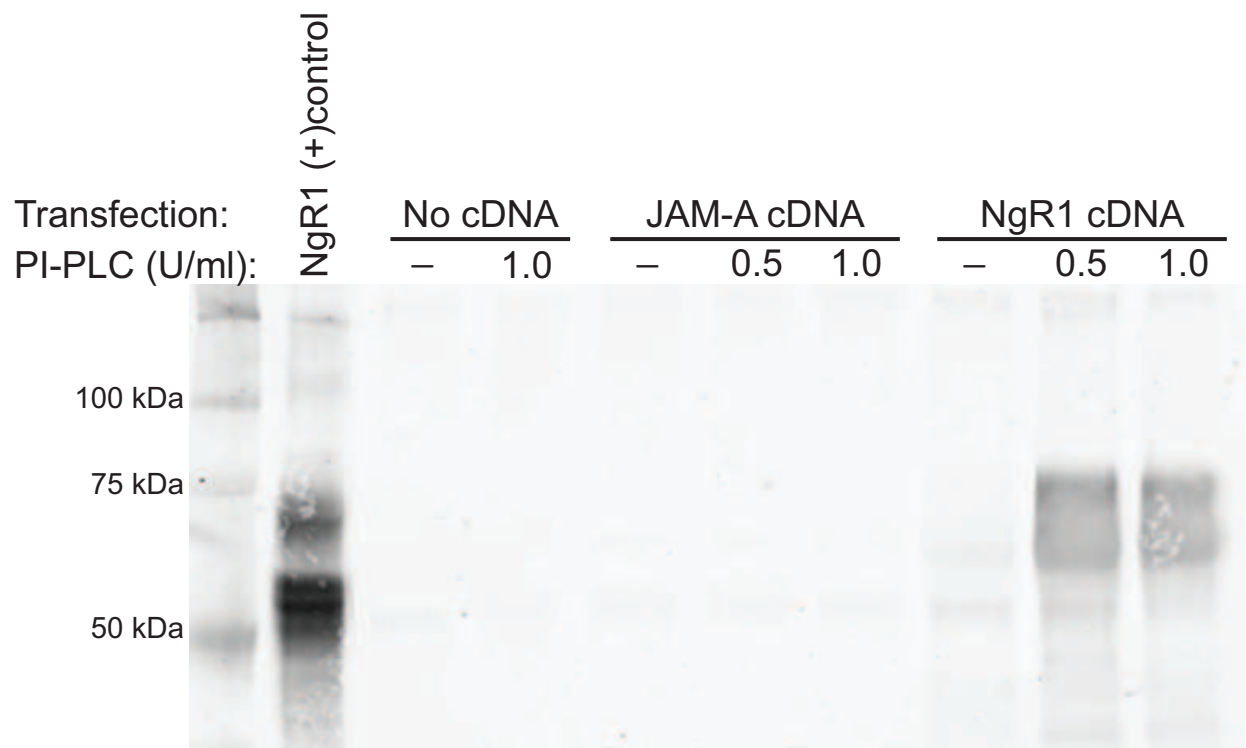

## Supplemental Figure 5

A

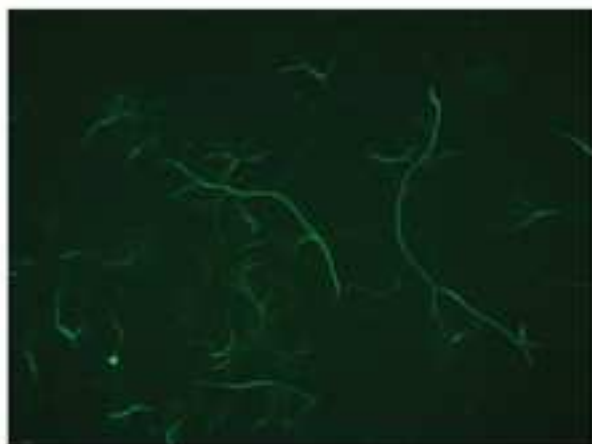

Fluorescence

B

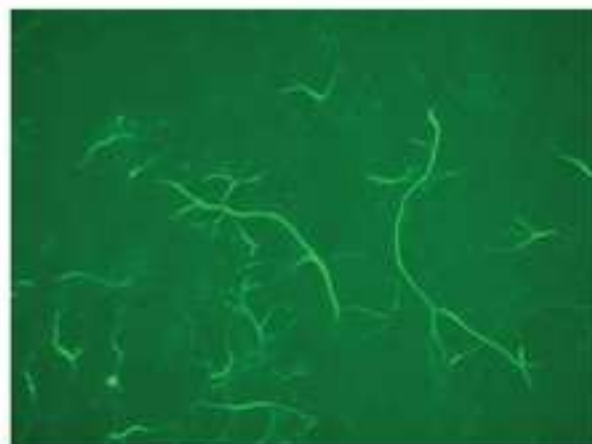

Brightfield and fluorescence

# Supplemental Figure 6

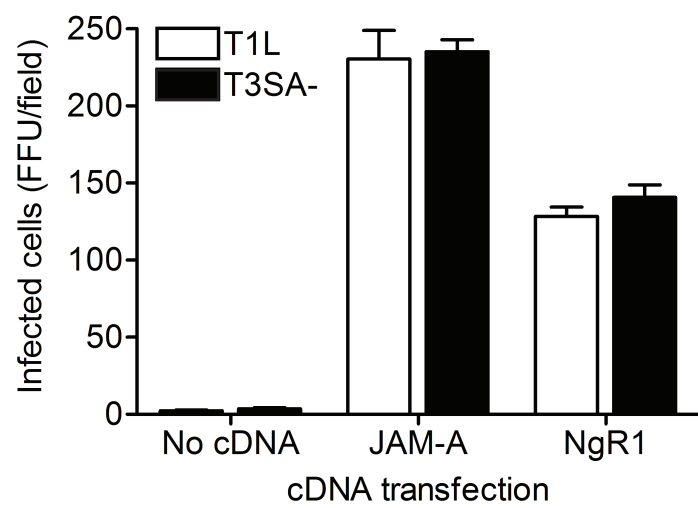

# Supplemental Figure 7

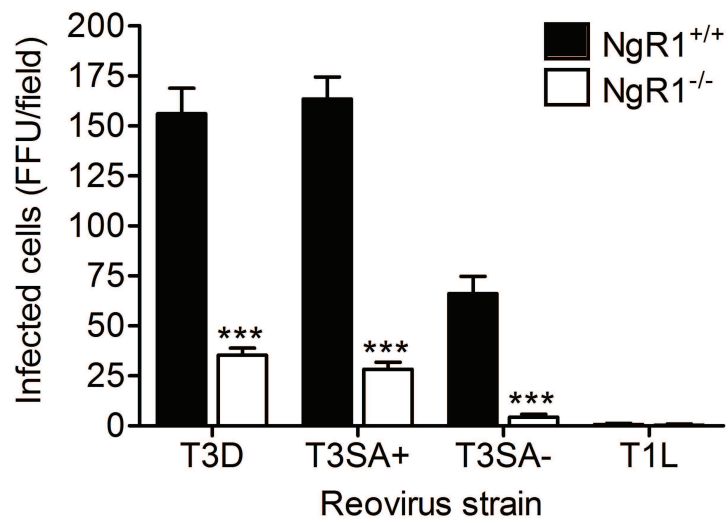

Supplement: NIHMS603274-supplement-02.pdf [file NIHMS603274-supplement-02.pdf]
